# Supplementary material for: DGCR8 deficiency impairs macrophage growth and unleashes the interferon response to mycobacteria
Source: Life Sci Alliance. 2021 Mar 26;4(6):e202000810. doi: 10.26508/lsa.202000810 (PMC8008949; doi:10.26508/lsa.202000810)
Supplement: Supplementary file 5 [file LSA-2020-00810_Table_S5.xlsx]

## Sheet: Sheet1
Supplementary Table S5: QC summary RNAseq data
Experimental condition	Sample	Input Reads	Uniquely mapped	Multiple loci mapped	Mapped all	% mapped uniquely	% mapped all
WT_mock_1	197375	46581619	42525243	3534103	46059346	91.2919	98.8788
KO_mock_1	197377	45606415	42112997	3132016	45245013	92.3401	99.2076
WT_TDM_1	197378	39521903	35995614	3194468	39190082	91.0776	99.1604
KO_TDM_1	197379	42744199	39454440	2894500	42348940	92.3036	99.0753
WT_mock_2	197380	51620572	47070192	4078033	51148225	91.1849	99.085
KO_mock_2	197381	59573687	55069700	3875393	58945093	92.4396	98.9448
WT_TDM_2	197382	59511830	54125479	4769669	58895148	90.9491	98.9638
KO_TDM_2	197384	46722567	43386434	2922280	46308714	92.8597	99.1142
Cre_mock_1	210618	50366370	46103727	3804009	49907736	91.5367	99.0894
Cre_TAM_1	210619	44465411	40636616	3267832	43904448	91.3893	98.7384
Cre_mock_2	210621	57968945	53039340	4451952	57491292	91.4961	99.176
Cre_TAM_2	210622	33519807	30582847	2455259	33038106	91.2381	98.5629
